# Supplementary material
Source: PubMed Central journal article supplement (PMC2799729)
Supplement: 0911937106_0911937106SI.pdf [file 0911937106_0911937106SI.pdf]

# Supporting Information

Hoskins et al. 10.1073/pnas.0911937106

## SI Methods

**GFP-15 Unfolding Assay.** Reaction mixtures (100  $\mu$ L) contained buffer A [20 mM Tris-HCl, pH 7.5, 100 mM KCl, 5 mM DTT, 0.1 mM EDTA, and 10% glycerol (vol/vol)], 0.005% Triton X-100 (vol/vol), 4 mM ATP or 2 mM ATP, and 2 mM ATP $\gamma$ S (Roche) where indicated, an ATP regenerating system (20 mM creatine phosphate and 6  $\mu$ g creatine kinase), 10 mM MgCl<sub>2</sub>, 2.0  $\mu$ M GFP-15, 3.0  $\mu$ M GroEL<sub>trap</sub>, and 1.0  $\mu$ M total ClpB. GFP-15 contains the N-terminal 15 aa of the P1 RepA replication initiator protein fused to the C-terminus of GFP (1). A mutant form of GroEL, GroEL<sub>trap</sub>, that binds but does not release unfolded proteins was included in the reaction mixtures to prevent GFP-15 refolding (2). Unfolding was monitored over time at 23 °C using a Varian Cary Eclipse fluorescence spectrophotometer with a well-plate reader. Excitation and emission wavelengths were 395 and 510 nm, respectively. For subunit mixing experiments, ClpB<sub>(wt)</sub> and ClpB mutant proteins, as indicated, were added to a total ClpB concentration of 1.0  $\mu$ M and reactions initiated by the addition of MgATP. GFP-15 unfolding rates were determined from the initial linear decrease in fluorescence intensities.

**GFP Reactivation.** GFP reactivation assays (100  $\mu$ L) contained buffer A, 4 mM ATP, an ATP regenerating system as above, 10 mM MgCl<sub>2</sub>, 10  $\mu$ L heat-aggregated GFP (heated 10 min at 80 °C at 4.5  $\mu$ M), and 1.0  $\mu$ M total ClpB, either ClpB<sub>(wt)</sub>, ClpB mutant, or a mixture containing both in various ratios as indicated. Reactions were initiated by the addition of MgATP, and reactivation was monitored over time at 23 °C as described above for GFP-15 unfolding. GFP reactivation rates were determined from the initial linear increase in fluorescence intensities.

**MDH Disaggregation.** Reaction mixtures (60  $\mu$ L) contained buffer A, 5 mM ATP, an ATP regenerating system as above, 0.005% Triton X-100 (vol/vol), 17 mM MgCl<sub>2</sub>, 25  $\mu$ L heat-aggregated [<sup>3</sup>H]MDH (prepared by heating 2.0  $\mu$ M [<sup>3</sup>H]MDH in 50 mM Tris-HCl, pH 7.5, 150 mM KCl, 2 mM DTT, and 0.1 mM EDTA for 33 min at 47 °C), 1.4  $\mu$ M DnaK, 0.25  $\mu$ M DnaJ, and 0.13  $\mu$ M

GrpE, and 0.5  $\mu$ M total ClpB, either ClpB<sub>(wt)</sub>, ClpB mutant, or a mixture containing both in various ratios as indicated. Reactions were initiated by the addition of MgATP. After a 40-min incubation at 30 °C, reactions were stopped with 75 mM EDTA and 75 mM (NH<sub>4</sub>)<sub>2</sub>SO<sub>4</sub>. The soluble fraction of [<sup>3</sup>H]MDH was separated by centrifugation and quantified by scintillation counting.

**GFP-38 Reactivation.** Reactivation assays (100  $\mu$ L) contained buffer A, 4 mM ATP, an ATP regenerating system as above, 10 mM MgCl<sub>2</sub>, 5  $\mu$ L heat-aggregated GFP-38 (heated 15 min at 80 °C at 14  $\mu$ M, frozen on dry ice, thawed, and used immediately), 0.9  $\mu$ M DnaK, 0.15  $\mu$ M DnaJ, 0.08  $\mu$ M GrpE, and 0.5  $\mu$ M total ClpB, either ClpB<sub>(wt)</sub>, ClpB mutant, or a mixture containing both in various ratios as indicated. Reactions were initiated by the addition of MgATP, and reactivation was monitored over time at 23 °C as described above for GFP-15 unfolding. GFP-38 reactivation rates were determined from the initial linear increase in fluorescence intensities.

**RepA Activation.** Reaction mixtures (20  $\mu$ L) contained buffer A, 4 mM ATP, 10 mM MgCl<sub>2</sub>, 50  $\mu$ g/mL BSA, 0.005% Triton X-100 (vol/vol), 4 nM RepA, and 1.0  $\mu$ M total ClpB, either ClpB<sub>(wt)</sub>, ClpB<sub>(B1,B2)</sub>, or a mixture containing both in various ratios as indicated. Reactions were initiated by the addition of MgATP. After 10 min at 23 °C, 25 mM EDTA was added, and the reactions were chilled to 0 °C. Calf thymus DNA (1  $\mu$ g) and 15 fmol of [<sup>3</sup>H]oriP1 plasmid DNA were added. After 5 min at 0 °C, the mixtures were filtered through nitrocellulose filters, and retained radioactivity was measured.

**ATPase.** Reaction mixtures (50  $\mu$ L) contained buffer A, 0.005% Triton X-100 (vol/vol), 4 mM ATP or 2 mM ATP, and 2 mM ATP $\gamma$ S as indicated, 0.1  $\mu$ Ci of [ $\gamma$ -<sup>33</sup>P]ATP (>3,000 Ci/mM; Perkin Elmer), 10 mM MgCl<sub>2</sub>, and 1.0  $\mu$ M total ClpB, either ClpB<sub>(wt)</sub>, ClpB<sub>(B1,B2)</sub>, or a mixture containing both in various ratios as indicated. Reactions were initiated by the addition of MgATP, incubated 30 min at 25 °C, and analyzed as described in ref. 3.

1. Hoskins JR, Yanagihara K, Mizuuchi K, Wickner S (2002) ClpAP and ClpXP degrade proteins with tags located in the interior of the primary sequence. *Proc Natl Acad Sci USA* 99:11037–11042.
2. Weber-BanEU, Reid BG, Miranker AD, Horwich AL (1999) Global unfolding of a substrate protein by the Hsp100 chaperone ClpA. *Nature* 401:90–93.

3. Shacter E (1984) Organic extraction of Pi with isobutanol/toluene. *Anal Biochem* 138:416–420.
